# Supplementary material for: Identification of a Large Family of Slam-Dependent Surface Lipoproteins in Gram-Negative Bacteria
Source: Front Cell Infect Microbiol. 2017 May 31;7:207. doi: 10.3389/fcimb.2017.00207 (PMC5449769; doi:10.3389/fcimb.2017.00207)
Supplement: Supplementary file 2 [file DataSheet2.xlsx]

## Sheet: Sheet1
Blast peformed: March 16, 2016
Phylum	Class	Order	Family	Genus	Species	Strain	Slams found
Proteobacteria	Alpha	Sphingomonadales	Sphingomonadaceae	Sphingobium	Sphingobium yanoikuyae	ATCC 51230	2
					Sphingobium chinhatense	IP26	1
					Sphingobium sp. HDIP04	-	1
					Sphingobium lucknowense	F2	1
					Sphingobium baderi	LL03	1
					Sphingobium sp. SYK-6	-	1
					Sphingobium japonicum	UT26S	1
					Sphingobium indicum	B90A	1
				Novosphingobium	Novosphingobium sp. P6W		1
					Novosphingobium resinovorum		1
					Novosphingobium sp. ST904		1
					Novosphingobium malaysiense		1
					Novosphingobium sp. Fuku2-ISO-50		2
					Novosphingobium pentaromativorans	US6-1	2
					Novosphingobium sp. Rr 2-17		1
					Novosphingobium sp. AP12		1
					Novosphingobium sp. KN65.2		1
					Novosphingobium sp. AAP1		1
					Novosphingobium sp. B-7		1
					Novosphingobium sp. FSW06-99		1
					Novosphingobium subterraneum		2
					Novosphingobium aromaticivorans	DSM 1244	1
					Novosphingobium sp. PP1Y		1
					Novosphingobium nitrogenifigens	DSM 19370	1
					Novosphingobium fuchskuhlense		1
					Novosphingobium sp. MBES04		1
				Sphingomonas	Sphingomonas paucimobilis		1
					Sphingomonas sp. LH128		1
					Sphingomonas sp. Leaf257		1
					Sphingomonas sanguinis		1
					Sphingomonas sp. S17		1
					Sphingomonas melonis		1
					Sphingomonas elodea		1
					Sphingomonas sp. WG		1
					Sphingomonas sp. Leaf62		1
					Sphingomonas sp. Leaf25		1
					Sphingomonas sp. Leaf22		1
					Sphingomonas wittichii		1
					Sphingomonas echinoides		1
					Sphingomonas taxi		1
					Sphingomonas sp. Leaf23		1
					Sphingomonas changbaiensis		1
					Sphingomonas sp. URHD0057		1
					Sphingomonas sp. Leaf208		1
					Sphingomonas sp. Leaf343		1
					Sphingomonas sp. Root1294		1
					Sphingomonas sp. Root50		1
					Sphingomonas sp. Root720		1
					Sphingomonas sp. YL-JM2C		1
					Sphingomonas sp. DC-6		1
					Sphingomonas sp. Y57		1
					Sphingomonas sp. Leaf412		1
					Sphingomonas sp. MEA3-1		1
					Sphingomonas sp. ERG5		1
				Sphingopyxis	Sphingopyxis sp. Root154		1
					Sphingopyxis sp. Root214		1
					Sphingopyxis granuli		1
					Sphingopyxis macrogoltabida		1
				Blastomonas	Blastomonas sp. AAP53		1
			Erythrobacteraceae		Porphyrobacter donghaensis		3
				Erythrobacter	Erythrobacter sp. SG61-1L		1
					Erythrobacter sp. YT30		1
					Erythrobacter sp. JL475		1
					Erythrobacter longus		1
					Erythrobacter sp. AP23		1
				Altererythrobacter	Altererythrobacter epoxidivorans		1
					Altererythrobacter sp. Root672		1
					Altererythrobacter atlanticus		1
				Croceicoccus	Croceicoccus naphthovorans		1
				-	Erythrobacteraceae bacterium HL-111		1
			-	-	Sphingomonadales bacterium BRH_c42		1
			-	-	Sphingomonadales bacterium BRH_c3		1
		Rhizobales	Aurantimonadaceae	Martelella	Martelella sp. AD-3		2
					Martelella mediterranea		2
					Martelella endophytica		2
				Aurantimonas	Aurantimonas sp. Leaf443		1
			Phyllobacteriaceae		Phyllobacterium sp. YR531		1
				Nitratireductor	Nitratireductor sp. ZZ-1		1
					Nitratireductor indicus	C115	1
					Nitratireductor pacificus	pht-3B	1
					Mesorhizobium sp. Root157		1
				Hoeflea	Hoeflea sp. BAL378		1
					Hoeflea sp. IMCC20628		1
					Aminobacter sp. J41		1
			Hyphomicrobiaceae	Pelagibacterium	Pelagibacterium halotolerans	B2	1
					Devosia chinhatensis		1
					Rhodoplanes sp. Z2-YC6860		2
			Rhizobiaceae	Rhizobium/Agrobacterium	Rhizobium sp. Root1240		1
					Rhizobium sp. Root274		1
					Rhizobium sp. AAP43		1
					Rhizobium sp. AAP116		1
					Agrobacterium albertimagni	AOL15	1
				Sinorhizobium	Sinorhizobium meliloti	Rm1021	1
					Sinorhizobium medicae		1
			Rhodobiaceae	Parvibaculum	Parvibaculum lavamentivorans	DS-1	1
					Afifella pfennigii		1
			Bradyrhizobiaceae	Afipia	Afipia sp. 1NLS2		1
					Afipia felis	ATCC 53690	1
					Afipia sp. Root123D2		1
					Afipia clevelandensis ATCC 49720		1
					Afipia sp. P52-10		1
					Afipia birgiae		1
					Afipia broomeae ATCC 49717		1
					Afipia massiliensis		1
				Rhodopseudomonas	Rhodopseudomonas palustris	CGA009	1
					Rhodopseudomonas sp. AAP120		1
				Nitrobacter	Nitrobacter hamburgensis X14		1
					Nitrobacter sp. Nb-311A		1
					Nitrobacter winogradskyi Nb-255		1
				Oligotropha	Oligotropha carboxidovorans	OM4	1
				-	Bradyrhizobiaceae bacterium SG-6C		1
			-	Xanthobacter	Xanthobacter autotrophicus	Py2	1
					Xanthobacter sp. 126		1
					Xanthobacter sp. 91		1
			Beijerinckiaceae	Methyloferula	Methyloferula stellata		1
					Methylocapsa acidiphila		1
			Methylocystaceae	Methylocystis	Methylocystis parvus		1
					Methylocystis sp. ATCC 49242		1
					Methylocystis sp. SC2		1
					Methylocystis rosea		1
					Methylocystis sp. SB2		1
					Methylocystis sp. LW5		1
				Methylosinus	Methylosinus sp. PW1		1
					Methylosinus sp. LW3		1
					Methylosinus sp. LW4		1
					Methylosinus trichosporium		1
			-	-	Methyloceanibacter caenitepidi		1
			-	-	Rhizobiales bacterium YIM 77505		1
			-	-	Meganema perideroedes		1
		-	Caulobacteraceae	Caulobacter	Caulobacter vibrioides		1
					Caulobacter sp. AP07		2
					Caulobacter sp. Root655		2
					Caulobacter sp. Root1472		1
					Caulobacter sp. Root342		1
					Caulobacter sp. Root343		1
				Asticcacaulis	Asticcacaulis excentricus	CB48	1
					Asticcacaulis biprosthecium		1
		Rhodobacterales	Rhodobacteraceae	Sagittula	Sagittula stellata	E-37	2
				-	Pseudooceanicola atlanticus		1
				Sulfitobacter	Sulfitobacter sp. NAS-14.1		2
					Sulfitobacter sp. EE-36		2
					Sulfitobacter pontiacus		2
					Sulfitobacter sp. CB2047		2
					Sulfitobacter mediterraneus		1
					Sulfitobacter donghicola		3
					Sulfitobacter noctilucae		1
					Sulfitobacter geojensis		2
					Sulfitobacter sp. 20_GPM-1509m		1
					Sulfitobacter pseudonitzschiae		1
					Sulfitobacter noctilucicola		1
					Sulfitobacter guttiformis		1
				Oceanicola	Oceanicola sp. S124		2
					Oceanicola batsensis		1
					Oceanicola sp. HL-35		2
					Oceanicola granulosus		2
					Oceanicola nanhaiensis		2
				Ruegeria	Ruegeria sp. ZGT108		1
					Ruegeria sp. ANG-S4		1
					Ruegeria sp. 6PALISEP08		1
					Silicibacter lacuscaerulensis ITI-1157		1
					Ruegeria pomeroyi		1
					Ruegeria sp. R11		1
				-	Shimia marina		1
				Celeribacter	Celeribacter marinus		2
					Celeribacter baekdonensis		2
					Celeribacter indicus		1
				Dinoroseobacter	Dinoroseobacter shibae		1
				Labrenzia	Labrenzia alexandrii		2
					Labrenzia alba		2
				Paracoccus	Paracoccus aminophilus		1
				Pannonibacter	Pannonibacter phragmitetus		1
					Pannonibacter indicus		1
				-	Pseudodonghicola xiamenensis		1
				Maritimibacter	Maritimibacter alkaliphilus		1
				Roseivivax	Roseivivax halodurans		1
					Roseivivax isoporae		1
					Roseivivax atlanticus		1
				-	Rhodovulum sp. NI22		1
				-	Confluentimicrobium sp. EMB200-NS6		1
				Gemmobacter	Gemmobacter nectariphilus		1
					Gemmobacter sp. LW-1		1
				-	Stappia stellulata		1
				Actibacterium	Actibacterium mucosum		1
				Thioclava	Thioclava sp. DT23-4		1
					Thioclava pacifica		1
					Thioclava dalianensis		1
				Aestuariivita	Aestuariivita atlantica		1
					Aestuariivita boseongensis		1
				Litoreibacter	Litoreibacter arenae		1
				Ponticoccus	Ponticoccus sp. SJ5A-1		1
					Ponticoccus sp. UMTAT08		1
				Roseovarius	Roseovarius indicus		1
					Roseovarius atlanticus		1
					Roseovarius sp. TM1035		1
					Roseovarius sp. MCTG156(2b)		1
					Roseovarius mucosus		1
				-	Tateyamaria sp. ANG-S1		1
				-	Ahrensia sp. R2A130		1
				Rubellimicrobium	Rubellimicrobium mesophilum		1
					Rubellimicrobium thermophilum		1
				Roseobacter	Roseobacter sp. GAI101		1
					Roseobacter sp. CCS2		1
				Thalassobius	Thalassobius mediterraneus		1
					Thalassobius gelatinovorus		1
				-	Pseudorhodobacter psychrotolerans		1
				Marinovum	Marinovum algicola		1
				Loktanella	Loktanella sp. 5RATIMAR09		1
					Loktanella cinnabarina		1
					Loktanella sp. S4079		1
					Loktanella sp. 3ANDIMAR09		1
					Loktanella vestfoldensis		1
					Loktanella sp. 1ANDIMAR09		1
					Loktanella hongkongensis		1
				Planktomarina	Planktomarina temperata		1
					Puniceibacterium sp. IMCC21224		1
					Phaeobacter sp. CECT 7735		1
					Tropicibacter naphthalenivorans		1
					Nereida ignava		1
					Aliiroseovarius crassostreae		1
				Leisingera	Leisingera sp. ANG-M1		1
					Leisingera aquimarina		1
					Leisingera sp. ANG-Vp		1
					Leisingera caerulea		1
					Leisingera daeponensis		1
					Leisingera sp. ANG-M6		1
					Leisingera sp. ANG-S5		1
					Leisingera sp. ANG-DT		1
					Leisingera sp. ANG-S3		1
					Leisingera sp. ANG-S		1
					Leisingera sp. ANG1		1
					Leisingera aquaemixtae		1
				Octadecabacter	Octadecabacter antarcticus		1
					Octadecabacter temperatus		1
				Rhodobacter	Candidatus Rhodobacter lobularis		1
					Rhodobacter sp. SW2		1
					Rhodobacter capsulatus		1
				-	Citreicella sp. 357		1
				-	Sedimentitalea nanhaiensis		1
				-	Halocynthiibacter arcticus		1
				Oceanibulbus	Oceanibulbus indolifex		2
				Salipiger	Salipiger mucosus		1
				Nautella	Nautella italica		1
					Nautella sp. ECSMB14104		1
				-	Rhodobacteraceae bacterium PD-2		1
				-	Rhodobacteraceae bacterium HL-91		1
				-	Rhodobacteraceae bacterium HLUCCO07		1
				-	Rhodobacteraceae bacterium HTCC2083		1
				-	Rhodobacteraceae bacterium HLUCCA08		1
			Hyphomonadaceae	-	Robiginitomaculum antarcticum		1
				-	Ponticaulis koreensis		1
			-	-	Rhodobacterales bacterium Y4I		1
		-	-	Parvularcula	Parvularcula bermudensis		1
		-	Rhodospirillaceae	Thalassospira	Thalassospira sp. HJ		1
					Thalassospira profundimaris		1
					Thalassospira sp. Nap_22		1
					Thalassospira australica		1
					Thalassospira xiamenensis		1
					Thalassospira permensis		1
					Thalassospira lucentensis		1
				Phaeospirillum	Phaeospirillum fulvum		1
					Phaeospirillum molischianum		1
				Rhodospirillum	Rhodospirillum rubrum		1
				Fodinicurvata	Fodinicurvata sediminis		1
					Fodinicurvata fenggangensis		1
				-	Elstera litoralis		1
				-	Dongia sp. URHE0060		1
		-	-	Magnetococcus	Magnetococcus marinus		1
		-	Pelagibacteraceae	-	Candidatus Pelagibacter sp. IMCC9063		1
				-	Pelagibacteraceae bacterium BACL20 MAG-120920-bin64		1
	Beta	Neisseriales	Neisseriaceae	Neisseria	Neisseria meningitidis	MC58	2
					Neisseria gonorrhoeae	FA1090	3
					Neisseria lactamica		4
					Neisseria polysaccharea		3
					Neisseria cinerea		4
					Neisseria macacae		5
					Neisseria sicca		4
					Neisseria sp. GT4A_CT1		5
					Neisseria sp. HMSC06F02		2
					Neisseria mucosa		4
					Neisseria subflava		2
					Neisseria flavescens		3
					Neisseria weaveri		4
					Neisseria sp. KH1503		2
					Neisseria shayeganii		2
					Neisseria sp. oral taxon 014		5
					Neisseria sp. 74A18		4
					Neisseria bacilliformis		5
					Neisseria elongata		2
					Neisseria sp. oral taxon 020		4
					Neisseria sp. 83E34		2
					Neisseria wadsworthii		2
				-	Morococcus cerebrosus		3
				Kingella	Kingella kingae		4
					Kingella oralis		2
					Kingella sp. Sch538		2
					Kingella denitrificans		5
				-	Alysiella crassa		2
				Eikenella	Eikenella corrodens ATCC 23834		2
				Simonsiella	Simonsiella muelleri		3
				-	Stenoxybacter acetivorans		1
				Conchiformibius	Conchiformibius steedae		4
					Conchiformibius kuhniae		4
			Chromobacteriaceae	-	Leeia oryzae		1
					Aquaspirillum serpens		1
					Aquitalea magnusonii		1
					Paludibacterium yongneupense		1
					Chitinilyticum litopenaei		1
		Burkholderiales	Alcaligenaceae	Advenella	Advenella mimigardefordensis		1
				Achromobacter	Achromobacter sp.		1
					Achromobacter insuavis		1
					Achromobacter xylosoxidans		1
				Oligella	Oligella urethralis		1
					Oligella ureolytica		1
				Alcaligenes	Alcaligenes sp. HPC1271		1
					Alcaligenes sp. EGD-AK7		1
					Alcaligenes faecalis		1
				-	Kerstersia gyiorum		4
				Taylorella	Taylorella equigenitalis		2
					Taylorella asinigenitalis		1
				Basilea	Basilea psittacipulmonis		2
			Comamonadaceae	-	Lampropedia cohaerens		1
				Acidovorax	Acidovorax sp. 12322-1		1
					Acidovorax sp. NO-1		1
					Acidovorax sp. Leaf78		1
					Acidovorax sp. Root219		1
					Acidovorax sp. Root217		1
					Acidovorax sp. Leaf76		1
					Acidovorax sp. Leaf84		1
					Acidovorax sp. Leaf191		1
					Acidovorax sp. Root402		1
					Acidovorax sp. Root70		1
					Acidovorax sp. CF316		1
					Acidovorax delafieldii		1
				Comamonas	Comamonas kerstersii		1
					Comamonas aquatica		1
					Comamonas granuli		1
				-	Polaromonas sp. CF318		1
				-	Curvibacter putative symbiont of Hydra magnipapillata		1
			Burkholderiaceae	Lautropia	Lautropia mirabilis		1
				Pandoraea	Pandoraea pnomenusa		1
					Pandoraea sp. SD6-2		1
					Pandoraea sp. RB44		1
			Oxalobacteraceae	Janthinobacterium	Janthinobacterium sp. Marseille		1
				Herbaspirrilum	Herbaspirillum autotrophicum		1
					Herbaspirillum rhizosphaerae		1
					Herbaspirillum hiltneri	N3	1
				Massilia	Massilia sp. Root351		1
					Massilia sp. BSC265		1
					Massilia sp. NR 4-1		1
					Massilia sp. WF1		1
					Massilia sp. WG5		1
					Massilia niastensis		1
					Massilia sp. Root133		1
					Massilia sp. Root1485		1
					Massilia timonae	CCUG 45783	1
					Massilia sp. Root418		1
					Massilia sp. LC238		1
					Massilia alkalitolerans		1
					Massilia sp. Root335		1
					Massilia sp. JS1662		1
				Duganella	Duganella zoogloeoides		1
					Duganella sp. Leaf61		1
				-	Noviherbaspirillum sp. Root189		1
				-	Oxalobacteraceae bacterium AB_14		1
				-	Herminiimonas arsenicoxydans		1
		Methylophilales	Methylophilaceae	Methylobacillus	Methylobacillus flagellatus		2
					Methylobacillus glycogenes		1
				-	Methylophilaceae bacterium 11		2
				Methylotenera	Methylotenera mobilis		1
			-	-	Methylophilales bacterium MBRSF5		1
			-	-	Methylophilales bacterium MBRSG12		1
			-	OM43 clade	Methylophilales bacterium MBRS-H7		1
					beta proteobacterium KB13		2
		-	Rhodocyclaceae	Thauera	Thauera linaloolentis		2
					Thauera terpenica		2
				Methyloversatilis	Methyloversatilis thermotolerans		1
					Methyloversatilis universalis		2
					Methyloversatilis discipulorum		2
				Azospira	Azospira oryzae		1
				Dechloromonas	Dechloromonas aromatica		1
				-	Azovibrio restrictus		1
		-	Gallionellaceae	Sideroxydans	Sideroxydans lithotrophicus	ES-1	1
				-	Gallionella sp. ShG14-8		1
		-	-	Sulfuricella	Sulfuricella sp. T08		3
					Sulfuricella denitrificans		1
					beta proteobacterium AAP121		1
					beta proteobacterium AAP65		1
					beta proteobacterium AAP51		1
		-	-	Candidatus Accumulibacter	Candidatus Accumulibacter sp. SK-02		1
					Candidatus Accumulibacter sp. SK-01		1
				Ferrovum	Ferrovum sp. PN-J185		1
					Ferrovum sp. JA12		1
					Ferrovum sp. Z-31		1
		-	-	-	Thiobacillus denitrificans		2
	Gamma	-	Pasteurellaceae	Haemophilus	Haemophilus parahaemolyticus		3
					Haemophilus parainfluenzae		2
					Haemophilus sputorum		2
					Haemophilus haemolyticus		1
					Haemophilus paraphrohaemolyticus		2
					Haemophilus pittmaniae HK 85		1
					Haemophilus sp. C1		1
					Haemophilus sp. oral taxon 851		1
					Haemophilus influenzae		3
					[Haemophilus] parasuis		2
					Haemophilus aegyptius		1
					Haemophilus sp. FF7		1
				Aggregatibacter	Aggregatibacter aphrophilus		1
					Aggregatibacter actinomycetemcomitans		1
					Aggregatibacter sp. oral taxon 458		3
					Aggregatibacter segnis		1
				-	Chelonobacter oris		1
				Pasteurella	Pasteurella multocida		1
					Pasteurella dagmatis		1
					[Pasteurella] pneumotropica		2
					Pasteurella bettyae		4
				Actinobacillus	Actinobacillus capsulatus		2
					[Actinobacillus] muris		1
					Actinobacillus pleuropneumoniae		3
					Actinobacillus suis		3
					Actinobacillus equuli		3
					Actinobacillus minor		3
					Actinobacillus ureae		1
					Actinobacillus succinogenes		2
				Mannheimia	Mannheimia varigena		4
					Mannheimia haemolytica		4
					Mannheimia granulomatis		3
					Mannheimia sp. MG13		2
				Gallibacterium	Gallibacterium anatis		3
					Gallibacterium genomosp. 1		4
					Gallibacterium genomosp. 2		3
				Bibersteinia	Bibersteinia trehalosi		5
				Histophilus	Histophilus somni		2
				Necropsobacter	Necropsobacter massiliensis		2
					Necropsobacter rosorum		2
				Avibacterium	Avibacterium paragallinarum		1
		Enterobacteriales	Enterobacteriaceae	Xenorhabdus	Xenorhabdus khoisanae		2
					Xenorhabdus cabanillasii		2
					Xenorhabdus bovienii		1
					Xenorhabdus doucetiae		2
					Xenorhabdus sp. NBAII XenSa04		2
					Xenorhabdus poinarii		2
					Xenorhabdus nematophila		2
					Xenorhabdus griffiniae		2
					Xenorhabdus sp. GDc328		2
					Xenorhabdus szentirmaii		2
				Photorhabdus	Photorhabdus luminescens		1
					Photorhabdus temperata		1
					Photorhabdus heterorhabditis		1
					Photorhabdus asymbiotica		1
				Brenneria	Brenneria goodwinii		1
					Brenneria sp. EniD312		1
				Erwinia	Erwinia iniecta		1
					Erwinia sp. Leaf53		1
					Erwinia sp. SCU-B244		1
				Edwardsiella	Edwardsiella hoshinae		1
					Edwardsiella piscicida		1
					Edwardsiella tarda		1
					Edwardsiella sp. EA181011		1
					Edwardsiella sp. LADL05-105		1
				Leciercia	Leclercia adecarboxylata		1
				Klebsiella	Klebsiella oxytoca		1
					Klebsiella sp. RIT-PI-d		1
				Proteus	Proteus mirabilis		1
					Proteus hauseri		1
					Proteus vulgaris		1
					Proteus penneri ATCC 35198		1
				Salmonella	Salmonella bongori		1
					Salmonella enterica		1
				Providencia	Providencia rettgeri		2
					Providencia stuartii		1
					Providencia sneebia		1
					Providencia burhodogranariea		1
					Providencia alcalifaciens		1
					Providencia rustigianii		1
				Escherichia	Escherichia coli		1
				Morganella	Morganella morganii		1
					Morganella sp. EGD-HP17		1
				Moellerella	Moellerella wisconsensis		1
				-	Arsenophonus nasoniae		1
		Pseudomonadales	Moraxellaceae	Acinetobacter	Acinetobacter sp. ANC 3880		1
					Acinetobacter sp. CIP 64.2		1
					Acinetobacter sp. CIP 110321		1
					Acinetobacter sp. NIPH 1859		1
					Acinetobacter sp. NBRC 110496		1
					Acinetobacter baumannii		1
					Acinetobacter calcoaceticus		1
					Acinetobacter sp. WC-323		1
					Acinetobacter pittii		1
					Acinetobacter sp. CIP 70.18		1
					Acinetobacter sp. NIPH 1847		1
					Acinetobacter gyllenbergii		1
					Acinetobacter sp. NIPH 809		1
					Acinetobacter sp. MN12		1
					Acinetobacter oleivorans		1
					Acinetobacter sp. NIPH 1867		1
					Acinetobacter sp. NIPH 3623		1
					Acinetobacter haemolyticus		1
					Acinetobacter sp. ADP1		1
					Acinetobacter sp. NIPH 542		1
					Acinetobacter sp. NIPH 2100		1
					Acinetobacter beijerinckii		1
					Acinetobacter baylyi DSM 14961 = CIP 107474		1
					Acinetobacter sp. ANC 4105		1
					Acinetobacter sp. V2		1
					Acinetobacter sp. ANC 3929		1
					Acinetobacter sp. NIPH 2168		1
					Acinetobacter sp. NIPH 298		1
					Acinetobacter sp. CIP-A165		1
					Acinetobacter sp. ATCC 27244		1
					Acinetobacter bereziniae		1
					Acinetobacter sp. Ag2		1
					Acinetobacter rudis		1
					Acinetobacter sp. WC-743		1
					Acinetobacter sp. Root1280		1
					Acinetobacter guillouiae		1
					Acinetobacter gerneri		1
					Acinetobacter sp. ETR1		1
					Acinetobacter sp. CIP 102136		1
					Acinetobacter sp. NIPH 713		1
					Acinetobacter sp. CIP 102637		1
					Acinetobacter sp. CIP 56.2		1
				Psychrobacter	Psychrobacter lutiphocae		1
					Psychrobacter sp. 1501(2011)		1
					Psychrobacter sp. PRwf-1		2
					Psychrobacter sp. PAMC 21119		1
					Psychrobacter sp. JCM 18903		1
					Psychrobacter phenylpyruvicus		1
					Psychrobacter sp. P2G3		1
				Moraxella	Moraxella catarrhalis		2
					Moraxella bovoculi		2
					Moraxella caprae		1
					Moraxella macacae		1
			Pseudomonadaceae	Pseudomonas	Pseudomonas fluorescens		1
					Pseudomonas sp. FH4		1
					Pseudomonas sp. CBZ-4		2
					Pseudomonas aeruginosa		1
					Pseudomonas putida		1
					Pseudomonas plecoglossicida		1
					Pseudomonas pelagia		2
					Pseudomonas parafulva		1
					Pseudomonas sp. CF161		1
					Pseudomonas cremoricolorata		1
					Pseudomonas stutzeri		1
					Pseudomonas sp. BAY1663		1
		Xanthomonadales	Xanthomonadaceae	Strenotrophomonas	Stenotrophomonas maltophilia		1
					Stenotrophomonas sp. DDT-1		1
					Stenotrophomonas sp. SKA14		1
					Stenotrophomonas sp. RIT309		1
					Stenotrophomonas ginsengisoli		1
				Xanthomonas	Xanthomonas hyacinthi		1
					Xanthomonas sp. SHU199		1
					Xanthomonas sp. SHU308		1
					Xanthomonas sp. SHU166		1
					Xanthomonas sacchari		1
					Xanthomonas arboricola		1
				-	[Pseudomonas] geniculata		1
				-	Lysobacter enzymogenes		1
			-	Frateuria	Frateuria aurantia		1
			Cardiobacteriaceae	Cardiobacterium	Cardiobacterium valvarum		2
					Cardiobacterium hominis		2
				Dichelobacter	Dichelobacter nodosus		2
			Piscirickettsiaceae	Methylophaga	Methylophaga nitratireducenticrescens		1
					Methylophaga aminisulfidivorans		1
					Methylophaga lonarensis		1
				Thiomicrospira	Thiomicrospira kuenenii		1
					Thiomicrospira sp. Milos-T1		1
		-	Vibrionaceae	Photobacterium	Photobacterium halotolerans		1
					Photobacterium galatheae		1
				Vibrio	Vibrio sinaloensis		1
					Vibrio harveyi group		1
					Vibrio coralliilyticus		1
					Vibrio nigripulchritudo		1
					Vibrio neptunius		1
					Vibrio sp. B183		1
					Vibrio sp. HENC-01		1
					Vibrio splendidus		1
					Vibrio fortis		1
					Vibrio sp. HENC-02		1
					Vibrio cholerae		1
		Oceanospirillales	Oceanospirillaceae	Marinomonas	Marinomonas sp. MWYL1		1
					Marinomonas profundimaris		1
				Nitrincola	Nitrincola lacisaponensis		1
					Nitrincola nitratireducens		1
				-	Osedax symbiont Rs1		1
				Marinobacterium	Marinobacterium jannaschii		1
					Marinobacterium rhizophilum		1
				-	Neptuniibacter caesariensis		1
			-	Hahella	Hahella chejuensis		1
		Alteromonadales	-	-	Moritella viscosa		1
			-	-	Catenovulum agarivorans		1
			-	Methyloglobulus	Methyloglobulus morosus		1
	Delta	Desulfobacterales	Desulfobacteraceae	Desulfobacter	Desulfobacter curvatus		1
					Desulfobacter vibrioformis		1
				-	Desulfospira joergensenii		1
				-	uncultured Desulfobacterium sp.		1
				-	Desulforegula conservatrix		1
				-	Candidatus Magnetoglobus multicellularis str. Araruama		1
				-	Candidatus Magnetomorum sp. HK-1		1
				-	Desulfatitalea sp. BRH_c12		1
				-	Desulfatirhabdium butyrativorans		1
				Desulfococcus	Desulfococcus oleovorans		1
			-	Desulfurivibrio	Desulfurivibrio alkaliphilus		1
		-	-	Desulfovibrio	Desulfovibrio inopinatus		1
					Desulfovibrio desulfuricans		1
					Desulfovibrio cuneatus		1
					Desulfovibrio sp. 6_1_46AFAA		1
					Desulfovibrio sp. 3_1_syn3		1
					Desulfovibrio fairfieldensis		1
		Syntrophobacterales	Syntrophaceae	Desulfobacca	Desulfobacca acetoxidans		1
				Syntrophus	Syntrophus aciditrophicus		2
				Syntrophobacter	Syntrophobacter fumaroxidans		2
		-	-	Geobacter	Geobacter daltonii		2
					Geobacter sp. OR-1		3
					Geobacter bremensis		3
					Geobacter sulfurreducens		3
					Geobacter sp. M21		3
					Geobacter sp. M18		2
					Geobacter lovleyi		1
		-	-	-	Hippea jasoniae		1
		-	-	-	delta proteobacterium MLMS-1		1
	Epsilon	Campylobacterales	Campylobacteraceae	Sulfurospirillum	Sulfurospirillum cavolei		2
					Sulfurospirillum sp. MES		1
					Sulfurospirillum barnesii		1
					Sulfurospirillum arsenophilum		1
				Arcobacter	Arcobacter butzleri		1
					Arcobacter sp. AF1581		1
					Arcobacter nitrofigilis		1
			Helicobacteraceae	Sulfuricurvum	Sulfuricurvum kujiense		1
					Sulfuricurvum sp. PC08-66		1
				Sulfurimonas	Sulfurimonas denitrificans		1
					Sulfurimonas sp. AST-10		1
					Sulfurimonas gotlandica		1
				-	Wolinella succinogenes		2
				-	Thiovulum sp. ES		1
			-	Sulfurovum	Sulfurovum sp. FS06-10		1
					Sulfurovum sp. FS08-3		1
	Zeta	-	-	Mariprofundus	Mariprofundus ferrooxydans	PV-1	1
					Total no. of Slams		832
					No. of bacterial species		637
					Slam selected for further analysis (in grey)		353
