# Supplementary material for: Identification of a Large Family of Slam-Dependent Surface Lipoproteins in Gram-Negative Bacteria
Source: Front Cell Infect Microbiol. 2017 May 31;7:207. doi: 10.3389/fcimb.2017.00207 (PMC5449769; doi:10.3389/fcimb.2017.00207)
Supplement: Supplementary file 3 [file DataSheet3.xlsx]

## Sheet: Sheet1
Bacterial species [phylum] taxid
	Protein ID	Protein name Blast score Blast E-value	Classification	Lipoprotein position	Notes
Neisseria gonorrhoeae FA 1090 [b-proteobacteria] taxid 242231
ref	YP_208725.1	outer membrane protein OmpU [Neisseria go... 578 0.0	0
ref	YP_207701.1	hypothetical protein NGO0555 [Neisseria g... 310 1e-95	0
ref	YP_209123.1	hypothetical protein NGO2111 [Neisseria g... 300 2e-91	2	upstream	NGO2109 - tonB (HpuB)	NGO2110 - hpuA (not in all strains)
Neisseria meningitidis MC58 [b-proteobacteria] taxid 122586
ref	NP_273362.1	hypothetical protein NMB0313 [Neisseria m... 574 0.0	0
ref	NP_274965.1	hypothetical protein NMB1971 [Neisseria m... 285 3e-86	2	upstream	tonB (HpuB)	hpuA (not in all strains)
Neisseria lactamica 020-06 [b-proteobacteria] taxid 489653
ref	YP_004048000.1	outer membrane protein OmpU [Neisseria... 573 0.0	0
ref	YP_004048426.1	hypothetical protein NLA_8070 [Neisser... 342 4e-109	0
ref	YP_004047717.1	hypothetical protein NLA_0770 [Neisser... 336 9e-106	1	upstream	NLA_0760 (large lipoprotein)
ref	YP_004049471.1	hypothetical protein NLA_19140 [Neisse... 284 1e-85	2	upstream	tonB (HpuB YP_004049473)	hpuA (not in all strains YP_004049472)
Neisseria polysaccharea [b-proteobacteria] taxid 489
gb	EFH22924.1	tetratricopeptide repeat protein [Neisseria... 375 4e-123	0
gb	EFH23292.1	hypothetical protein NEIPOLOT_00984 [Neisse... 358 2e-113	1	upstream	lipoprotein_5(NEIPOLOT_00985)
gb	EFH23366.1	hypothetical protein NEIPOLOT_00757 [Neisse... 281 1e-84	2	upstream	hpuA (NEIPOLOT_00756)	hpuB (NEIPOLOT_00755)
Neisseria cinerea ATCC 14685 [b-proteobacteria] taxid 546262
gb	EEZ71698.1	tetratricopeptide repeat protein [Neisseria... 506 2e-172	0
gb	EEZ71253.1	hypothetical protein NEICINOT_04706 [Neisse... 327 8e-103	1	upsteam	lipoprotein_5(NEICINOT_04707)
gb	EEZ71259.1	tetratricopeptide repeat protein [Neisseria... 305 1e-93	2	upstream	lipoprotein_PagP_barrel (NEICINOT_04529)	TonBDR (NEICINOT_04527)
gb	EEZ71996.1	hypothetical protein NEICINOT_03832 [Neisse... 260 1e-76	2	upsteam	hpuA (NEICINOT_03830)	hpuB (NEICINOT_03829)
Neisseria macacae [b-proteobacteria] taxid 496
ref	WP_003776417.1	membrane protein [Neisseria macacae] 468 4e-157	0
ref	WP_003779968.1	hypothetical protein [Neisseria macacae] 347 3e-110	0
ref	WP_003779248.1	hypothetical protein [Neisseria macacae] 312 1e-96	0
ref	WP_003778617.1	hypothetical protein [Neisseria macacae] 305 4e-94	99		** downstream not available
ref	WP_003779827.1	hypothetical protein [Neisseria macacae] 296 2e-90	0
Neisseria sicca ATCC 29256 [b-proteobacteria] taxid 547045
gb	EET45568.1	hypothetical protein NEISICOT_00786 [Neisse... 465 7e-156	0
gb	EET44112.1	hypothetical protein NEISICOT_02065 [Neisse... 362 3e-116	1	upstream	lipoprotein(NEISICOT_02066)
gb	EET44277.1	tetratricopeptide repeat protein [Neisseria... 343 8e-109	0
gb	EET42954.1	tetratricopeptide repeat protein [Neisseria... 297 7e-91	0
Neisseria sp. GT4A_CT1 [b-proteobacteria] taxid 665946
ref	WP_009311010.1	membrane protein [Neisseria sp. GT4A_CT1] 464 1e-155	0
ref	WP_009311604.1	membrane protein [Neisseria sp. GT4A_CT1] 360 3e-115	0
ref	WP_009312642.1	hypothetical protein [Neisseria sp. GT... 346 7e-110	0
ref	WP_009312101.1	hypothetical protein [Neisseria sp. GT... 312 7e-97	0
ref	WP_009312731.1	hypothetical protein [Neisseria sp. GT... 298 2e-91	0
Neisseria mucosa ATCC 25996 [b-proteobacteria] taxid 546266
gb	EFC89425.1	tetratricopeptide repeat protein [Neisseria... 444 5e-148	0
gb	EFC88130.1	hypothetical protein NEIMUCOT_05499 [Neisse... 345 1e-109	0
gb	EFC89038.1	hypothetical protein NEIMUCOT_04322 [Neisse... 334 2e-105	1	upstream	lipoprotein_5(NEIMUCOT_04320)
gb	EFC87193.1	hypothetical protein NEIMUCOT_06402 [Neisse... 294 2e-89	2	upstream	hpuA (NEIMUCOT_06403)	hpuB (NEIMUCOT_06404)
Haemophilus parainfluenzae T3T1 [g-proteobacteria] taxid 862965
ref	YP_004822451.1	hypothetical protein PARA_07530 [Haemo... 441 1e-146	1	upstream	PARA_07540 (lipoprotein_5)	PARA_07550 (lipoprotein_5)
ref	YP_004822333.1	hypothetical protein PARA_06350 [Haemo... 308 5e-95	1	upstream	PARA_06340 (lipoprotein_5)
Haemophilus sputorum HK 2154 [g-proteobacteria] taxid 1078483
gb	EJP29819.1	PF04575 family protein [Haemophilus sputoru... 436 4e-145	1	upstream	two tbpB-like (HMPREF1128_1324,5)
gb	EJP29425.1	PF04575 family protein [Haemophilus sputoru... 326 1e-102	1	upstream	putative lipoprotein (HMPREF1128_1743)
Neisseria subflava [b-proteobacteria] taxid 28449
ref	WP_004520943.1	membrane protein [Neisseria subflava] 437 6e-145	0
ref	WP_004521012.1	hypothetical protein [Neisseria subflava] 312 8e-97	0
Aggregatibacter actinomycetemcomitans D7S-1 [g-proteobacteria] taxid 694569
ref	YP_006287241.1	chromosomal replication initiation pro... 436 1e-144	1	upstream	lipoprotein (D7S_01669)		geneid: D7S_01670, 12836870
Neisseria flavescens NRL30031/H210 [b-proteobacteria] taxid 546264
gb	EEG33735.1	hypothetical protein NEIFLAOT_01218 [Neisse... 436 2e-144	0
gb	EEG33447.1	tetratricopeptide repeat protein [Neisseria... 331 5e-104	1	upstream	lipoprotein_5(NEIFLAOT_01483)
gb	EEG33746.1	hypothetical protein NEIFLAOT_01150 [Neisse... 229 4e-65	2	upstream	hpuA-like (NEIFLAOT_01151)	hpuB-like (NEIFLAOT_01152,53)
Haemophilus parahaemolyticus HK385 [g-proteobacteria] taxid 1095744
gb	EIJ73275.1	PF04575 family protein [Haemophilus parahae... 434 6e-144	1	downstream	tbpB-like (HMPREF1128_1325)
gb	EIJ72376.1	PF04575 family protein [Haemophilus parahae... 337 2e-106	1	downstream	lipoprotein (HMPREF1050_1463)
gb	EIJ68615.1	PF04575 family protein [Haemophilus parahae... 279 1e-84	1	upstream	lipoprotein (HMPREF1050_1158)
Aggregatibacter aphrophilus ATCC 33389 [g-proteobacteria] taxid 985008
gb	EGY30487.1	chromosomal replication initiation protein ... 433 8e-144	0
Haemophilus haemolyticus M21621 [g-proteobacteria] taxid 1028805
gb	EGT78619.1	putative tetratricopeptide-like helical [Ha... 431 2e-142	99		upstream unavailable
Haemophilus paraphrohaemolyticus HK411 [g-proteobacteria] taxid 1095743
gb	EIG26658.1	PF04575 family protein [Haemophilus paraphr... 429 3e-142	0
gb	EIG26603.1	PF04575 family protein [Haemophilus paraphr... 335 7e-106	1		lipoprotein (HMPREF1054_2047)
Aggregatibacter sp. oral taxon 458 str. W10330 [g-proteobacteria] taxid 1321772
gb	ERH27911.1	tetratricopeptide repeat protein [Aggregati... 425 1e-140	1	upstream	lipoprotein (HMPREF9065_00958)
gb	ERH26517.1	tetratricopeptide repeat protein [Aggregati... 342 4e-109	1	upstream	lipoprotein (HMPREF9065_01857)
gb	ERH26373.1	tetratricopeptide repeat protein [Aggregati... 336 4e-106	1	upstream	lipoproten (HMPREF9065_01942)
Pasteurella multocida 671/90 [g-proteobacteria] taxid 1290393
gb	EPE71081.1	hypothetical protein H364_10135 [Pasteurell... 425 3e-140	1	downstream	lipoprotein(H364_10140)
Haemophilus pittmaniae HK 85 [g-proteobacteria] taxid 1035188
gb	EGV06232.1	hypothetical protein HMPREF9952_0087 [Haemo... 418 5e-138	1	upstream	two tbpB-like (HMPREF9952_0086,5)
Neisseria shayeganii 871 [b-proteobacteria] taxid 1032488
gb	EGY51632.1	tetratricopeptide repeat protein [Neisseria... 418 7e-138	0
gb	EGY52083.1	hypothetical protein HMPREF9371_1713 [Neiss... 295 3e-90	2	upstream	hpuA-like (HMPREF9371_1712)	hpuB-like (HMPREF9371_1711)
Haemophilus influenzae 10810 [g-proteobacteria] taxid 862964
ref	YP_005179138.1	hypothetical protein HIB_11120 [Haemop... 414 2e-136	1	upstream	next to lipoprotein_5 (HIB_11110)
ref	YP_005179162.1	hypothetical protein HIB_11360 [Haemop... 394 3e-128	2	upstream	tbpB (YP_0051791611)	tbpA (YP_005179160)
ref	YP_005179375.1	hypothetical protein HIB_13500 [Haemop... 280 3e-85	1	upstream	next to lipoprotein_5 (HIB_13490)
Pasteurella pneumotropica [g-proteobacteria] taxid 758
ref	WP_026215402.1	hypothetical protein [Pasteurella pneu... 406 1e-133	1	downstream	lipoprotein(WP_026215403.1)
ref	WP_018356089.1	hypothetical protein [Pasteurella pneu... 322 2e-100	0
Mannheimia varigena USDA-ARS-USMARC-1261 [g-proteobacteria] taxid 1432056
gb	AHG74462.1	outer membrane protein [Mannheimia varigena... 407 1e-133	0
gb	AHG73942.1	outer membrane protein [Mannheimia varigena... 323 3e-101	1	downstrean	lipoprotein(X781_17960,AHG73943.1)
gb	AHG72759.1	hypothetical protein X781_6100 [Mannheimia ... 321 1e-100	1	upstream	lipoprotein(X781_6090)
gb	AHG74273.1	outer membrane protein [Mannheimia varigena... 171 1e-45	1	downstream	lipoprotein(X781_21300,AHG74275.1)
Pasteurella dagmatis ATCC 43325 [g-proteobacteria] taxid 667128
gb	EEX49394.1	tetratricopeptide repeat protein [Pasteurel... 407 2e-133	1	upstream	lipoprotein (HMPREF0621_2028)
Actinobacillus capsulatus [g-proteobacteria] taxid 717
ref	WP_018652594.1	membrane protein [Actinobacillus capsu... 407 2e-133	0
ref	WP_018651602.1	hypothetical protein [Actinobacillus c... 362 5e-116	1	downstream	lipoprotein(WP_018651603.1)	tonBDR(WP_018651604.1)
Actinobacillus suis H91-0380 [g-proteobacteria] taxid 696748
ref	YP_006818587.1	hypothetical protein ASU2_11105 [Actin... 405 5e-133	0
ref	YP_006816568.1	hypothetical protein ASU2_00935 [Actin... 354 4e-113	2	downstream	tbpB-like (ASU2_00940)	tbpB-like (ASU2_00945) - annotated as CirA
ref	YP_006816785.1	hypothetical protein ASU2_02020 [Actin... 340 8e-108	0
Aggregatibacter segnis ATCC 33393 [g-proteobacteria] taxid 888057
gb	EFU67148.1	outer membrane protein [Aggregatibacter seg... 405 9e-133	1	upstream	TbpB-like (HMPREF9064_1496)
Actinobacillus pleuropneumoniae serovar 5b str. L20 [g-proteobacteria] taxid 416269
ref	YP_001054681.1	hypothetical protein APL_2002 [Actinob... 404 2e-132	0
ref	YP_001053622.1	hypothetical protein APL_0921 [Actinob... 341 3e-108	0
ref	YP_001054397.1	hypothetical protein (APL_1708+APL_1709) [Actinob... 148 5e-38	1	upstream	lipoprotein5-like (APL_1707)
Gallibacterium anatis 12656/12 [g-proteobacteria] taxid 1195244
gb	ERF78641.1	hypothetical protein N561_05325 [Gallibacte... 405 2e-132	1	upstream	2 lipoproteins (N561_05320,15)
gb	ERF77362.1	hypothetical protein N561_11900 [Gallibacte... 328 7e-103	1	upstream	lipoprotein (N561_11905)
gb	ERF78430.1	hypothetical protein N561_06150 [Gallibacte... 268 4e-80	1	upstream	lipoprotein(N561_06145)
Haemophilus parasuis 174 [g-proteobacteria] taxid 1275972
gb	EQA11805.1	hypothetical protein HPS174_1276 [Haemophil... 403 2e-132	1	upstream	lipoprotein (HPS174_1279)
gb	EQA11857.1	hypothetical protein HPS174_1328 [Haemophil... 397 7e-130	2	upstream	hpuA-like (HPS174_1332)	hpuB-like(HPS174_1333)
Actinobacillus minor NM305 [g-proteobacteria] taxid 637911
gb	EER46289.1	hypothetical protein AM305_02268 [Actinobac... 402 8e-132	1	upstream	lipoprotein(AM305_02253)
gb	EER46767.1	hypothetical protein AM305_11330 [Actinobac... 362 3e-116	1	upstream	lipoprotein(AM305_11335)
gb	EER46710.1	hypothetical protein AM305_11045 [Actinobac... 321 6e-101	1	upstream	lipoprotein(AM305_11050)
Neisseria weaveri ATCC 51223 [b-proteobacteria] taxid 1051972
gb	EGV34687.1	hypothetical protein l13_19460 [Neisseria w... 399 2e-130	1	upstream	lipoprotein( l13_19450)
gb	EGV34749.1	hypothetical protein l13_20100 [Neisseria w... 365 7e-117	2	upstream	tonBDR(l13_20090)	tbpB_like(l13_20080)
gb	EGV37314.1	hypothetical protein l13_04260 [Neisseria w... 340 8e-108	1	upstream	lipoprotein(l13_04270)
gb	EGV37339.1	hypothetical protein l13_03710 [Neisseria w... 264 4e-78	2	upstream	hpuA(l13_03730)	hpuB(l13_03730)
Mannheimia granulomatis [g-proteobacteria] taxid 85402
ref	WP_027073954.1	membrane protein [Mannheimia granuloma... 393 4e-128	2	upstream	lipoprotein(WP_027073953.1)	tonBDR(WP_027073952.1) - cirA-like
ref	WP_027074929.1	membrane protein [Mannheimia granuloma... 321 7e-101	1	downstream	lipoprotein(WP_027074930.1)
ref	WP_027073705.1	hypothetical protein [Mannheimia granu... 285 1e-86	1	upstream	lipoprotein(WP_027073704.1)
Eikenella corrodens ATCC 23834 [b-proteobacteria] taxid 546274
gb	EEG23722.1	tetratricopeptide repeat protein [Eikenella... 390 6e-127	1	upstream	hpuA-like(EIKCOROL_01603)
gb	EEG25238.1	hypothetical protein EIKCOROL_00057 [Eikene... 321 1e-99	1	upstream	hpuA-like(EIKCOROL_00056)
Bibersteinia trehalosi USDA-ARS-USMARC-188 [g-proteobacteria] taxid 1263829
gb	AHG81155.1	outer membrane protein [Bibersteinia trehal... 389 1e-126	0
gb	AHG81838.1	outer membrane protein [Bibersteinia trehal... 344 4e-109	0
gb	AHG82357.1	hypothetical protein F542_16420 [Biberstein... 324 3e-101	2	upstream	two lipoproteins(AHG82356.1,AHG82355.1)	tonBDR(AHG82354.1)
gb	AHG80966.1	hypothetical protein F542_2480 [Bibersteini... 287 6e-88	1	upstream	lipoprotein(AHG80965.1)
gb	AHG82549.1	outer membrane protein [Bibersteinia trehal... 251 9e-75	1	upstream	lipoprotein(AHG82547.1)
Haemophilus aegyptius ATCC 11116 [g-proteobacteria] taxid 888728
gb	EGF17390.1	outer membrane protein [Haemophilus aegypti... 389 1e-126	2	upstream	hpuA-like (HMPREF9095_0807)	hpuB-like (HMPREF9095_0806)
Cardiobacterium valvarum F0432 [g-proteobacteria] taxid 797473
gb	EHM52366.1	hypothetical protein HMPREF9080_02373 [Card... 389 1e-126	0
gb	EHM55621.1	hypothetical protein HMPREF9080_00586 [Card... 361 3e-115	1	upstream	hpuA-like (HMPREF9080_00584)
Xenorhabdus cabanillasii JM26 [enterobacteria] taxid 1427517
emb	CDL85826.1	conserved exported hypothetical protein [X... 388 3e-126	0
emb	CDL86978.1	conserved exported hypothetical protein [X... 335 7e-106	0
Acinetobacter sp. CIP 64.2 [g-proteobacteria] taxid 1217694
gb	ENX15493.1	hypothetical protein F895_02039 [Acinetobac... 389 3e-126	2	upstream	tbpB-like (F895_02040)	tonBDR( F895_02041)
Acinetobacter sp. NIPH 1859 [g-proteobacteria] taxid 1217695
gb	ENX34198.1	hypothetical protein F889_02862 [Acinetobac... 388 4e-126	2	upstream	tbpB_like(F889_02861)	tonBDR(F889_02860)
Conchiformibius steedae [b-proteobacteria] taxid 153493
ref	WP_027021763.1	hypothetical protein [Conchiformibius ... 387 6e-126	2	downstream	tonDBR(WP_027021765.1)	lipoprotein_5(WP_027021765.1)
ref	WP_027022112.1	hypothetical protein [Conchiformibius ... 358 2e-114	0
ref	WP_027022147.1	hypothetical protein [Conchiformibius ... 250 4e-73	2	downstream	lipoprotein_5(WP_027022148.1)	tonBDR(WP_027022149.1)
ref	WP_027022142.1	hypothetical protein [Conchiformibius ... 212 5e-59	0
Acinetobacter calcoaceticus NIPH 13 [g-proteobacteria] taxid 1217654
gb	ENU08295.1	hypothetical protein F997_01739 [Acinetobac... 387 1e-125	2	upstream	tbpb_like(F997_01738)	tonBDR(F997_01737)
Cardiobacterium hominis ATCC 15826 [g-proteobacteria] taxid 638300
gb	EEV89727.1	hypothetical protein HMPREF0198_0196 [Cardi... 385 2e-125	0
gb	EEV89289.1	hypothetical protein HMPREF0198_0618 [Cardi... 359 2e-114	0
Acinetobacter baumannii 146457 [g-proteobacteria] taxid 1310623
gb	EXB47076.1	hypothetical protein J522_2644 [Acinetobact... 386 2e-125	2	upstream	tbpB-like(J522_2643)	tbpA-like(J522_2642)
Kingella kingae ATCC 23330 [b-proteobacteria] taxid 887327
gb	EGK10813.1	outer membrane protein [Kingella kingae ATC... 385 3e-125	1	upstream	tbpB-like(HMPREF0476_0596)
gb	EGK10545.1	outer membrane protein [Kingella kingae ATC... 305 4e-94	1	upstream	lipoprotein(HMPREF0476_0700)
gb	EGK06923.1	outer membrane protein [Kingella kingae ATC... 303 1e-92	1	upstream	lipoprotein(HMPREF0476_1975)
gb	EGK09280.1	hypothetical protein HMPREF0476_0944 [Kinge... 279 5e-83	0
Acinetobacter sp. NIPH 1847 [g-proteobacteria] taxid 1217697
ref	WP_005230511.1	hypothetical protein [Acinetobacter sp... 385 5e-125	99		No genomic record could be found
Moraxella catarrhalis BC1 [g-proteobacteria] taxid 857576
gb	EGE18067.1	hypothetical protein E9Q_04609 [Moraxella c... 385 6e-125	2	upstream/downstream	tonBDR-upstream(E9Q_04619)	lipoprotein(E9Q_04594)
gb	EGE20353.1	hypothetical protein E9Q_00977 [Moraxella c... 211 5e-58	2	upstream	tonBDR(E9Q_00982)	lipoprotien(E9Q_00987)
Xenorhabdus doucetiae [enterobacteria] taxid 351671
emb	CDG19653.1	conserved exported protein of unknown func... 384 1e-124	0
emb	CDG19650.1	conserved exported protein of unknown func... 338 8e-107	1	upstream	lipoprotein_5(CDG19649.1)
Pseudomonas fluorescens [g-proteobacteria] taxid 294
ref	WP_032866253.1	peptide signal [Pseudomonas fluorescens] 371 8e-120	0
Acinetobacter sp. WC-323 [g-proteobacteria] taxid 903918
gb	EKU54922.1	PF04575 family protein [Acinetobacter sp. W... 384 2e-124	2	upstream	lipoprotein (ACINWC323_1572)	tonBDR(EKU54845)
Photorhabdus luminescens subsp. laumondii TTO1 [enterobacteria] taxid 243265
ref	NP_930731.1	hypothetical protein plu3514 [Photorhabdu... 384 3e-124	2	upstream	lipoprotein (F902_02456)	tonBDR(F902_02457)
Xenorhabdus bovienii str. Jollieti [enterobacteria] taxid 1379676
emb	CDH29233.1	conserved hypothetical protein; putative e... 383 3e-124	0
Acinetobacter sp. CIP 70.18 [g-proteobacteria] taxid 1217700
gb	ENX58055.1	hypothetical protein F902_02455 [Acinetobac... 383 3e-124	1	upstream	lipoprotein(F902_02456)	tonBDR(F902_02457)
Acinetobacter sp. NIPH 809 [g-proteobacteria] taxid 1217713
ref	WP_004653518.1	hypothetical protein [Acinetobacter sp... 383 5e-124	2	upstream/downstream	tonBDR(WP_004653516.1-17.1)	lipoprotein_5(WP_004653519.1)
Acinetobacter gyllenbergii CIP 110306 [g-proteobacteria] taxid 1217657
gb	EPF88142.1	hypothetical protein F957_01429 [Acinetobac... 382 1e-123	2	upstream	lipoprotein(F957_01430)	tonBDR(F957_01431)
Acinetobacter sp. MN12 [g-proteobacteria] taxid 1513354
ref	WP_033132818.1	peptide signal protein [Acinetobacter ... 381 3e-123	2	downstream	lipoprotein("WP_033132819.1")	tonBDR("WP_032858953.1")
Acinetobacter haemolyticus NIPH 261 [g-proteobacteria] taxid 1217986
gb	ENW19885.1	hypothetical protein F926_01983 [Acinetobac... 381 3e-123	2	upstream	lipoprotein(F926_01982)	tonBDR(F926_01981)
Acinetobacter pittii 42F [g-proteobacteria] taxid 1147132
emb	CDH39465.1	hypothetical protein APICBIBUN_02163 [Acin... 382 4e-123	2	upstream	lipoprotein(APICBIBUN_02158)	tonBDR(APICBIBUN_02153)
Acinetobacter oleivorans DR1 [g-proteobacteria] taxid 436717
ref	YP_003733216.1	hypothetical protein AOLE_14780 [Acine... 380 6e-123	2	upstream	lipoprotein(AOLE_14785)	tonBDR(AOLE_14790)
Photorhabdus temperata J3 [enterobacteria] taxid 1389415
gb	ERT12303.1	hypothetical protein O185_14840 [Photorhabd... 380 9e-123	2	upstream/downstream	lipoprotein(O185_14835)	tonBDR( O185_14845)
Xenorhabdus poinarii G6 [enterobacteria] taxid 1354304
emb	CDG23326.1	conserved exported protein of unknown func... 379 1e-122	0
emb	CDG23323.1	conserved exported protein of unknown func... 343 1e-108	0
Acinetobacter sp. NIPH 1867 [g-proteobacteria] taxid 1217702
ref	WP_005212408.1	hypothetical protein [Acinetobacter sp... 379 3e-122	1	upstream	pagP(F901_02945)	tonBDR(F901_02946)
Xenorhabdus nematophila ATCC 19061 [enterobacteria] taxid 406817
ref	YP_003710424.1	hypothetical protein XNC1_0074 [Xenorh... 378 3e-122	2	upstream/downstream	tonB-downstream (XNC_0073)	Lipoprotein_5 - upstream XNC1_0075
ref	YP_003712979.1	hypothetical protein XNC1_2789 [Xenorh... 199 4e-54	1	upstream	nilC ( lipoprotein ??)		nilB
Conchiformibius kuhniae [b-proteobacteria] taxid 211502
ref	WP_027010229.1	hypothetical protein [Conchiformibius ... 378 3e-122	2	upstream	tonBDR(WP_027010228.1)	lipoprotein(WP_027010227.1)
ref	WP_027008625.1	hypothetical protein [Conchiformibius ... 305 5e-94	1	upstream	hypothetical protein(WP_027008624.1)
ref	WP_027009654.1	hypothetical protein [Conchiformibius ... 249 8e-73	2	upstream	lipoprotein(WP_027009655.1)	tonBDR(WP_027009656.1)
ref	WP_027009835.1	hypothetical protein [Conchiformibius ... 217 1e-60	0
Methylophaga nitratireducenticrescens [g-proteobacteria] taxid 754476
ref	WP_014708003.1	peptide signal [Methylophaga nitratire... 376 7e-121	0
Pseudomonas sp. FH4 [g-proteobacteria] taxid 1284393
gb	ETK21126.1	putative peptide signal [Pseudomonas sp. FH4] 374 8e-121	0
Acinetobacter sp. ADP1 [g-proteobacteria] taxid 62977
ref	WP_011182294.1	peptide signal protein [Acinetobacter ... 374 2e-120	0
Photorhabdus asymbiotica subsp. asymbiotica ATCC 43949 [enterobacteria] taxid 553480
emb	CAR66577.1	Conserved Hypothetical Protein [Photorhabd... 373 4e-120	0
Xenorhabdus szentirmaii DSM 16338 [enterobacteria] taxid 1427518
emb	CDL84018.1	conserved exported hypothetical protein [X... 372 4e-120	0
emb	CDL84013.1	conserved exported hypothetical protein [X... 331 1e-103	0
Acinetobacter baylyi DSM 14961 = CIP 107474 [g-proteobacteria] taxid 1120924
gb	ENV54519.1	hypothetical protein F952_01199 [Acinetobac... 372 5e-120	0
Acinetobacter sp. ANC 3929 [g-proteobacteria] taxid 1217707
ref	WP_005152949.1	hypothetical protein [Acinetobacter sp... 372 7e-120	0
Acinetobacter sp. NIPH 2100 [g-proteobacteria] taxid 1217708
ref	WP_005294147.1	hypothetical protein [Acinetobacter sp... 372 8e-120	0
Acinetobacter sp. ANC 4105 [g-proteobacteria] taxid 1217703
ref	WP_005188432.1	hypothetical protein [Acinetobacter sp... 372 8e-120	0
Pseudomonas sp. CBZ-4 [g-proteobacteria] taxid 1163065
ref	WP_032865216.1	peptide signal [Pseudomonas sp. CBZ-4] 371 8e-120	0
ref	WP_017734969.1	hypothetical protein [Pseudomonas sp. ... 328 6e-103	0
Acinetobacter sp. NIPH 2168 [g-proteobacteria] taxid 1217706
ref	WP_005257723.1	hypothetical protein [Acinetobacter sp... 371 3e-119	0
Acinetobacter sp. CIP-A165 [g-proteobacteria] taxid 40373
ref	WP_004671167.1	hypothetical protein [Acinetobacter sp... 370 3e-119	0
Acinetobacter beijerinckii CIP 110307 [g-proteobacteria] taxid 1217648
gb	ENW07491.1	hypothetical protein F933_00686 [Acinetobac... 370 4e-119	0
Methylophaga aminisulfidivorans [g-proteobacteria] taxid 230105
ref	WP_007144108.1	peptide signal [Methylophaga aminisulf... 367 6e-118	0
Actinobacillus succinogenes 130Z [g-proteobacteria] taxid 339671
ref	YP_001345130.1	hypothetical protein Asuc_1844 [Actino... 366 1e-117	2	downstream	Asuc_1843 (may have a lipobox)	Asuc_1842 (tonB-receptor)
ref	YP_001345328.1	hypothetical protein Asuc_2047 [Actino... 320 2e-100	1	upstream	Asuc_2048 (lipprotein_5)
Brenneria sp. EniD312 [enterobacteria] taxid 598467
ref	WP_009111278.1	protein of unknown function DUF560 [Br... 366 3e-117	0
ref	WP_009113502.1	protein of unknown function DUF560 [Br... 253 5e-74	0
Haemophilus somnus 129PT [g-proteobacteria] taxid 205914
ref	YP_718655.1	hypothetical protein HS_0446 [Haemophilus... 365 3e-117	2	upstream	YP_718658.1 (tbpB)	YP_718659.1 (tbpA)
ref	YP_718834.1	hypothetical protein HS_0622 [Haemophilus... 275 3e-83	1	upstream	lipoprotein5-like (HS_0621) YP_718833.1
Pseudomonas putida [g-proteobacteria] taxid 303
ref	WP_012271197.1	peptide signal [Pseudomonas putida] 365 3e-117	0
Simonsiella muelleri ATCC 29453 [b-proteobacteria] taxid 641147
gb	EFG31650.2	hypothetical protein HMPREF9021_00045 [Simo... 365 5e-117	0
gb	EFG29992.2	hypothetical protein HMPREF9021_02190 [Simo... 346 3e-110	1	upstream	lipoprotein(HMPREF9021_02189.1)
gb	EFG31830.2	hypothetical protein HMPREF9021_00229 [Simo... 295 5e-90	99	upstream	hypothetical protein(HMPREF9021_00230)		** end of contig
Acinetobacter sp. ATCC 27244 [g-proteobacteria] taxid 525244
ref	WP_008941392.1	peptide signal protein [Acinetobacter ... 364 6e-117	0
Marinomonas sp. MWYL1 [g-proteobacteria] taxid 400668
ref	WP_012071963.1	peptide signal [Marinomonas sp. MWYL1] 363 3e-116	2	upstream	lipoprotein(Mmwyl1_4302,YP_001343132.1)	tonBDR(Mmwyl1_4301,YP_001343131.1)
Pseudomonas pelagia [g-proteobacteria] taxid 553151
ref	WP_022961967.1	peptide signal [Pseudomonas pelagia] 362 4e-116	0
ref	WP_022964134.1	hypothetical protein [Pseudomonas pela... 310 7e-96	0
Kingella sp. Sch538 [b-proteobacteria] taxid 1522312
ref	WP_032136735.1	membrane protein [Kingella sp. Sch538] 361 6e-116	0
ref	WP_032136971.1	membrane protein [Kingella sp. Sch538] 306 1e-95	1	upstream	lipoprotein(WP_032136970.1)
Kingella oralis ATCC 51147 [b-proteobacteria] taxid 629741
gb	EEP67970.1	hypothetical protein GCWU000324_02221 [King... 360 3e-115	1	upstream	lipoprotein(GCWU000324_02222)
gb	EEP67129.1	hypothetical protein GCWU000324_02702 [King... 332 2e-104	1	upstream	lipoprotein(GCWU000324_02703)
Edwardsiella hoshinae [enterobacteria] taxid 93378
ref	WP_024522114.1	hypothetical protein [Edwardsiella hos... 358 4e-115	1	upstream	lipoprotein(WP_024522115.1)
Kingella denitrificans ATCC 33394 [b-proteobacteria] taxid 888741
gb	EGC16236.1	hypothetical protein HMPREF9098_2345 [Kinge... 357 3e-114	1	upstream	hpuA-like(HMPREF9098_2343)
gb	EGC16464.1	hypothetical protein HMPREF9098_2058 [Kinge... 347 2e-110	0
gb	EGC18302.1	hypothetical protein HMPREF9098_0451 [Kinge... 341 5e-108	1	upstream	lipoprotein(HMPREF9098_0450)
gb	EGC16717.1	hypothetical protein HMPREF9098_1914 [Kinge... 316 2e-98	1	upstream	lipoprotein(HMPREF9098_1915)
gb	EGC18296.1	hypothetical protein HMPREF9098_0445 [Kinge... 279 1e-83	2	upstream	hpuA(HMPREF9098_0447)	hpuB(HMPREF9098_0448)
Neisseria sp. oral taxon 014 str. F0314 [b-proteobacteria] taxid 641149
gb	EFI24315.1	hypothetical protein HMPREF9016_00492 [Neis... 356 6e-114	1	upstream	lipoprotein(HMPREF9016_00491)
gb	EFI23257.1	hypothetical protein HMPREF9016_01645 [Neis... 345 2e-109	0
gb	EFI24628.1	hypothetical protein HMPREF9016_00808 [Neis... 322 1e-101	2	upstream	hpuA(HMPREF9016_00807)	hpuB(HMPREF9016_00806)
gb	EFI24780.1	hypothetical protein HMPREF9016_00960 [Neis... 311 1e-96	0
gb	EFI24668.1	hypothetical protein HMPREF9016_00848 [Neis... 310 1e-95	0
Neisseria bacilliformis ATCC BAA-1200 [b-proteobacteria] taxid 888742
gb	EGF06055.1	outer membrane protein [Neisseria bacillifo... 356 7e-114	0
gb	EGF06819.1	hypothetical protein HMPREF9123_2779 [Neiss... 335 1e-105	1	upstream	lipoprotein(HMPREF9123_2780)
gb	EGF09009.1	hypothetical protein HMPREF9123_2444 [Neiss... 311 2e-96	1	upstream	lipoprotein( HMPREF9123_2443)
gb	EGF09998.1	hypothetical protein HMPREF9123_2250 [Neiss... 262 2e-78	0
gb	EGF09887.1	tetratricopeptide repeat protein [Neisseria... 154 1e-37	0
Methylophaga lonarensis MPL [g-proteobacteria] taxid 1286106
gb	EMR13198.1	hypothetical protein MPL1_06345 [Methylopha... 355 8e-114	0
Stenotrophomonas maltophilia AU12-09 [g-proteobacteria] taxid 1235458
gb	EMI49824.1	hypothetical protein C405_09500 [Stenotroph... 356 9e-114	0
Edwardsiella tarda EIB202 [enterobacteria] taxid 498217
ref	YP_003295967.1	hypothetical protein ETAE_1919 [Edward... 355 1e-113	1	downstream	lipoprotein(ETAE_1920)
Acinetobacter bereziniae CIP 70.12 [g-proteobacteria] taxid 1217650
gb	ENV97895.1	hypothetical protein F938_01305 [Acinetobac... 356 2e-113	1	upstream	lipoprotein(F938_01306)	tonBDR(F938_01307)
Marinomonas sp. D104 [g-proteobacteria] taxid 1208321
ref	WP_024023554.1	peptide signal [Marinomonas sp. D104] 356 2e-113	0
Vibrio sinaloensis DSM 21326 [g-proteobacteria] taxid 945550
gb	EGA70619.1	putative peptide signal [Vibrio sinaloensis... 355 3e-113	0
Psychrobacter sp. 1501(2011) [g-proteobacteria] taxid 1002339
ref	WP_007395117.1	hypothetical protein [Psychrobacter sp... 353 3e-112	1	upstream	lipoprotein(HMPREF9373_1758)
Dichelobacter nodosus VCS1703A [g-proteobacteria] taxid 246195
ref	YP_001208963.1	hypothetical protein DNO_0025 [Dichelo... 351 6e-112	1	upstream	DNO_0024 (lipoprotein)
ref	YP_001210173.1	DNO_1302 [Dichelobacter nodosus VCS... 346 7e-110	0
Acinetobacter sp. WC-743 [g-proteobacteria] taxid 903945
ref	WP_009586467.1	PF04575 family protein [Acinetobacter ... 352 6e-112	0
Edwardsiella piscicida [enterobacteria] taxid 1263550
dbj	GAJ68712.1	hypothetical protein MA13_contig00012-0112... 348 3e-111	1	downstream	lipoprotein(GAJ68711.1,MA13_contig00012-0111)
Neisseria sp. oral taxon 020 str. F0370 [b-proteobacteria] taxid 1127694
gb	EKY04196.1	hypothetical protein HMPREF9120_02401 [Neis... 348 6e-111	0
gb	EKY03560.1	hypothetical protein HMPREF9120_02660 [Neis... 317 2e-98	0
gb	EKY04775.1	hypothetical protein HMPREF9120_02117 [Neis... 297 8e-91	2	upstream	lipoprotein(HMPREF9120_02115)	tonBDR(HMPREF9120_02114)
gb	EKY04884.1	hypothetical protein HMPREF9120_02045 [Neis... 276 5e-83	0
Pseudomonas parafulva [g-proteobacteria] taxid 157782
ref	WP_028633427.1	peptide signal [Pseudomonas parafulva] 347 5e-110	0
Photobacterium halotolerans [g-proteobacteria] taxid 265726
gb	KDM92480.1	hypothetical protein EA58_05935 [Photobacte... 344 7e-109	2	upstream	lipoprotein(KDM92481.1)	tonBDR(KDM92482.1)
Novosphingobium resinovorum [a-proteobacteria] taxid 158500
gb	EZP67765.1	hypothetical protein BV97_05684 [Novosphing... 343 1e-108	0
Acinetobacter rudis CIP 110305 [g-proteobacteria] taxid 421052
gb	EPF70154.1	hypothetical protein F945_03171 [Acinetobac... 342 2e-108	0
Acinetobacter guillouiae NIPH 991 [g-proteobacteria] taxid 1217656
gb	ENV16841.1	hypothetical protein F964_02589 [Acinetobac... 340 2e-107	0
Leclercia adecarboxylata ATCC 23216 = NBRC 102595 [enterobacteria] taxid 911008
gb	KFC89597.1	TPR repeat-containing protein [Leclercia ad... 338 9e-107	1	upstream	lipoprotein(KFC89596.1)
Pasteurella bettyae CCUG 2042 [g-proteobacteria] taxid 1095749
gb	EIJ72157.1	PF04575 family protein [Pasteurella bettyae... 338 1e-106	0
gb	EIJ68836.1	PF04575 family protein [Pasteurella bettyae... 322 2e-100	0
gb	EIJ71592.1	PF04575 family protein [Pasteurella bettyae... 313 1e-97	1	upstream	lipoprotein(HMPREF1052_0003)
gb	EIJ70618.1	PF04575 family protein [Pasteurella bettyae... 303 4e-93	0
Sphingobium yanoikuyae ATCC 51230 [a-proteobacteria] taxid 883163
gb	EKU73367.1	hypothetical protein HMPREF9718_03836 [Sphi... 338 1e-106	0
gb	EKU72922.1	hypothetical protein HMPREF9718_04285 [Sphi... 166 4e-42	1	downstream	lipoprotein_5(HMPREF9718_04286)
Alcaligenes faecalis [b-proteobacteria] taxid 511
ref	WP_003801273.1	hypothetical protein [Alcaligenes faec... 326 6e-102	0
Stenotrophomonas sp. SKA14 [g-proteobacteria] taxid 391601
ref	WP_008266966.1	hypothetical protein [Stenotrophomonas... 337 2e-106	0
Moritella viscosa [g-proteobacteria] taxid 80854
emb	CED61265.1	putative exported protein [Moritella viscosa] 337 3e-106	2	upstream	hypothetical protein (CED61264.1)	two lipoproteins (CED61263.1,CED61262.1)	tonBDR(CED61261.1)
Acinetobacter sp. ETR1 [g-proteobacteria] taxid 1485002
gb	KEC84668.1	peptide signal protein [Acinetobacter sp. E... 336 6e-106	0
Acinetobacter gerneri DSM 14967 = CIP 107464 [g-proteobacteria] taxid 1120926
gb	ENV32188.1	hypothetical protein F960_03576 [Acinetobac... 335 8e-106	0
Vibrio sp. HENC-01 [g-proteobacteria] taxid 992010
ref	WP_009696525.1	peptide signal [Vibrio sp. HENC-01] 335 1e-105	2	upstream	hypothetical(WP_009696524.1)	two lipoprotein(WP_009696523.1,WP_009696522.1)	tonBDR(WP_009696521.1)
Xanthomonas sp. SHU308 [g-proteobacteria] taxid 1248412
ref	WP_026143810.1	hypothetical protein [Xanthomonas sp. ... 335 1e-105	0
Xanthomonas sp. SHU199 [g-proteobacteria] taxid 1240783
ref	WP_026144068.1	hypothetical protein [Xanthomonas sp. ... 335 1e-105	0
Alcaligenes sp. HPC1271 [b-proteobacteria] taxid 1069631
ref	WP_009454610.1	hypothetical protein [Alcaligenes sp. ... 335 2e-105	0
Alcaligenes sp. EGD-AK7 [b-proteobacteria] taxid 1386079
gb	ERI34647.1	hypothetical protein N879_03680 [Alcaligene... 335 2e-105	0
Advenella mimigardefordensis DPN7 [b-proteobacteria] taxid 1247726
gb	AHG65297.1	TPR domain-containing protein [Advenella mi... 332 4e-105	0
Vibrio nigripulchritudo MADA3021 [g-proteobacteria] taxid 1238443
emb	CCN55069.1	conserved hypothetical protein [Vibrio nig... 334 5e-105	2	upstream	lipoproteins(CCN55072.1,CCN55071.1)	tonBDR(CCN55073.1)
Vibrio coralliilyticus ATCC BAA-450 [g-proteobacteria] taxid 675814
gb	EEX35446.1	hypothetical protein VIC_000101 [Vibrio cor... 333 6e-105	0
Sphingomonas paucimobilis [a-proteobacteria] taxid 13689
gb	EZP68930.1	hypothetical protein BV96_04164 [Sphingomon... 333 8e-105	0
Pseudomonas plecoglossicida NB2011 [g-proteobacteria] taxid 1330531
gb	EPB94367.1	putative peptide signal [Pseudomonas plecog... 333 8e-105	0
[Pseudomonas] geniculata [g-proteobacteria] taxid 86188
ref	WP_010485371.1	hypothetical protein [[Pseudomonas] ge... 333 1e-104	0
Nitrincola lacisaponensis [g-proteobacteria] taxid 267850
gb	KDE38769.1	outer membrane protein [Nitrincola lacisapo... 332 2e-104	0
Neisseria elongata subsp. glycolytica ATCC 29315 [b-proteobacteria] taxid 546263
gb	EFE49497.1	hypothetical protein NEIELOOT_01754 [Neisse... 330 7e-104	0
gb	EFE50120.1	hypothetical protein NEIELOOT_01153 [Neisse... 303 4e-93	0
Sphingomonas sp. LH128 [a-proteobacteria] taxid 473781
ref	WP_008828493.1	hypothetical protein [Sphingomonas sp.... 327 7e-103	0
Haemophilus sp. FF7 [g-proteobacteria] taxid 1461579
ref	WP_032108851.1	hypothetical protein [Haemophilus sp. ... 327 2e-102	2	upstream	lipoprotein(WP_032108751.1)	tonBDR(WP_032108852.1)
Vibrio splendidus [g-proteobacteria] taxid 29497
ref	WP_017087533.1	hypothetical protein [Vibrio splendidus] 327 2e-102	2	upstream	liipoproteins(A147_RS0122890, A147_RS0122885)	tonBDR(A147_RS0122895)
Sphingobium chinhatense IP26 [a-proteobacteria] taxid 1346790
gb	EPR18773.1	hypothetical protein M527_11435 [Sphingobiu... 327 3e-102	0
Sphingobium sp. HDIP04 [a-proteobacteria] taxid 428994
gb	EQB00342.1	hypothetical protein L286_17815 [Sphingobiu... 327 3e-102	0
Sphingobium lucknowense F2 [a-proteobacteria] taxid 1450518
gb	KER36093.1	hypothetical protein AL00_12625 [Sphingobiu... 327 3e-102	0
Vibrio sp. B183 [g-proteobacteria] taxid 1526762
gb	KFI09570.1	hypothetical protein IX95_22690 [Vibrio sp.... 326 5e-102	0
Providencia rettgeri Dmel1 [enterobacteria] taxid 1141663
gb	EKT55157.1	hypothetical protein OOC_16509 [Providencia... 326 6e-102	2	upstream/downstream	upstream - lipoprotein( OOC_16504)	downstream- tonBDR(OOC_16514)
gb	EKT56732.1	hypothetical protein OOC_10911 [Providencia... 208 1e-57	0
Psychrobacter sp. PRwf-1 [g-proteobacteria] taxid 349106
ref	WP_011961156.1	hypothetical protein [Psychrobacter sp... 325 2e-101	1	upstream	two lipoproteins - PsycPRwf_1942, PsycPRwf_1941)
ref	WP_011959704.1	hypothetical protein [Psychrobacter sp... 309 1e-95	1	upstream	lipoprotein(PsycPRwf_0415,YP_001279320.1)
Sphingomonas melonis [a-proteobacteria] taxid 152682
ref	WP_017977756.1	hypothetical protein [Sphingomonas mel... 323 5e-101	0
Stenotrophomonas sp. RIT309 [g-proteobacteria] taxid 1470590
ref	WP_032974588.1	hypothetical protein [Stenotrophomonas... 323 8e-101	0
Sphingomonas sp. S17 [a-proteobacteria] taxid 1007104
ref	WP_007404878.1	hypothetical protein [Sphingomonas sp.... 323 9e-101	0
Pseudomonas cremoricolorata [g-proteobacteria] taxid 157783
gb	AIR88291.1	hypothetical protein LK03_03135 [Pseudomona... 322 1e-100	0
Vibrio fortis [g-proteobacteria] taxid 212667
ref	WP_032552619.1	peptide signal [Vibrio fortis] 321 3e-100	2	upstream	lipoproteins(VFDL14_RS05210,VFDL14_20375)	tonBDR(VFDL14_RS05215)
Avibacterium paragallinarum JF4211 [g-proteobacteria] taxid 1351754
emb	CDG00171.1	Putative PF04575 family protein [Avibacter... 320 2e-99	0
Salmonella bongori N268-08 [enterobacteria] taxid 1197719
ref	YP_008322314.1	TPR repeat protein [Salmonella bongori... 316 3e-99	1	downstream	lipoprotein_5(A464_1718,YP_008322313.1)
Psychrobacter sp. PAMC 21119 [g-proteobacteria] taxid 1112209
ref	WP_010199858.1	hypothetical protein [Psychrobacter sp... 319 5e-99	99			nothing downstream *** end of contig
Salmonella enterica subsp. arizonae serovar 62:z4,z23:- str. RSK2980 [enterobacteria] taxid 882884
ref	YP_001571161.1	hypothetical protein SARI_02142 [Salmo... 316 5e-99	1	upstream/dpwnstream	lipoprotein_pectic lyase (SARI_02141)	downstream - pagP barrel (SARI_02143)
Caulobacter sp. AP07 [a-proteobacteria] taxid 1144304
ref	WP_007661406.1	cytochrome c biogenesis factor [Caulob... 318 6e-99	2	upstream	lipoprotein(PMI01_00025)	tonBDR(PMI01_00026)
ref	WP_007665966.1	thioredoxin domain-containing protein ... 144 2e-34	0
Acinetobacter sp. CIP 102136 [g-proteobacteria] taxid 1144665
ref	WP_005254590.1	hypothetical protein [Acinetobacter sp... 317 7e-99	0
Acinetobacter sp. NIPH 713 [g-proteobacteria] taxid 1217709
ref	WP_005166871.1	hypothetical protein [Acinetobacter sp... 313 2e-97	0
Psychrobacter sp. JCM 18903 [g-proteobacteria] taxid 1298610
dbj	GAF62526.1	LOW QUALITY PROTEIN: FOG protein containin... 314 2e-97	0
Acinetobacter sp. CIP 102637 [g-proteobacteria] taxid 1144669
ref	WP_004797780.1	hypothetical protein [Acinetobacter sp... 313 2e-97	0
Sphingomonas taxi [a-proteobacteria] taxid 1549858
gb	AIT07927.1	hypothetical protein MC45_02020 [Sphingomon... 311 7e-97	0
Necropsobacter rosorum [g-proteobacteria] taxid 908285
ref	WP_032093020.1	hypothetical protein [Necropsobacter r... 312 7e-97	2	upstream	lipoprotein(WP_032092940.1)	tonBDR(WP_032093019.1)
ref	WP_032093746.1	hypothetical protein [Necropsobacter r... 307 6e-95	1	upstream	lipoprotein_like(WP_032093745.1)
Escherichia coli UMEA 3052-1 [enterobacteria] taxid 1281177
gb	EQW39635.1	hypothetical protein G902_00451 [Escherichi... 312 1e-96	0
Psychrobacter phenylpyruvicus [g-proteobacteria] taxid 29432
ref	WP_028859773.1	hypothetical protein [Psychrobacter ph... 313 1e-96	99		orf at the end of contig!!
Pseudomonas stutzeri DSM 10701 [g-proteobacteria] taxid 1123519
ref	YP_006525501.1	hypothetical protein PSJM300_15405 [Ps... 309 1e-95	0
Thauera linaloolentis 47Lol = DSM 12138 [b-proteobacteria] taxid 1123367
gb	ENO90259.1	hypothetical protein C666_02305 [Thauera li... 305 1e-93	2	upstream/downstream	upstream - tonB(C666_02295)	downstream - lipoprotein(C666_02310)
gb	ENO83340.1	hypothetical protein C666_18955, partial [T... 285 1e-86	99			nothing in the contig around it
Methylobacillus flagellatus KT [b-proteobacteria] taxid 265072
ref	YP_546781.1	hypothetical protein Mfla_2677 [Methyloba... 302 4e-93	0
ref	YP_545235.1	hypothetical protein Mfla_1126 [Methyloba... 146 2e-35	0
Providencia stuartii ATCC 25827 [enterobacteria] taxid 471874
gb	EDU58991.1	tetratricopeptide repeat protein [Providenc... 295 3e-90	0
Frateuria aurantia DSM 6220 [g-proteobacteria] taxid 767434
ref	YP_005379128.1	hypothetical protein [Frateuria aurant... 295 8e-90	2	upstream	lipoprotein(Fraau_3119,YP_005379127.1)	tonBDR(Fraau_3118,YP_005379126.1)
Achromobacter xylosoxidans NBRC 15126 = ATCC 27061 [b-proteobacteria] taxid 1216976
ref	YP_008923984.1	TPR repeat protein [Achromobacter xylo... 294 5e-89	0
Providencia sneebia DSM 19967 [enterobacteria] taxid 1141660
gb	EKT60955.1	hypothetical protein OO7_02661 [Providencia... 289 8e-88	2	upstream/downstream	lipoprotein(OO7_02666)	tonBDR( OO7_02656)
Taylorella equigenitalis MCE9 [b-proteobacteria] taxid 937774
ref	YP_004129975.1	TPR repeat containing protein [Taylore... 286 3e-87	2	downstream	lipoprotein(TEQUI_0902)	tonBDR(TEQUI_0903)
ref	YP_004130364.1	outer membrane protein [Taylorella equ... 229 4e-65	0
Pseudomonas aeruginosa PA1 [g-proteobacteria] taxid 1279007
ref	YP_008813482.1	outer membrane protein [Pseudomonas ae... 285 2e-86	0
Mannheimia haemolytica M42548 [g-proteobacteria] taxid 1316932
ref	AGK00978	hypothetical protein DUF560 [Mannheimia … 280 2e-89	0
ref	AGK02439	TPR repeat- and DUF560 domain-containing ... 179 3e-51	2	upstream	lipoprotein(MHH_RS23485)	tonBDR(MHH_RS23490)
ref	AGK01728	TPR repeat domain-containing … 107 2e-25	1	upstream	lipoprotein(MHH_RS20060)
ref	AGK01362	putative outer membrane protein DUF560 … 64/7 2e-11	1	upstream	lipoprotein(MHH_RS18220)
Moraxella caprae [g-proteobacteria] taxid 90240
ref	WP_029103339.1	hypothetical protein [Moraxella caprae] 278 2e-84	2	upstream	lipoprotein(WP_029103338.1)	tonBDR(WP_029103337.1)
Basilea psittacipulmonis DSM 24701 [b-proteobacteria] taxid 1072685
gb	AIL32164.1	hypothetical protein IX83_01460 [Basilea ps... 276 5e-83	2	upstream	lipoprotein(IX83_01470)	hypothetical protein (IX83_01465)
gb	AIL32200.1	hypothetical protein IX83_01730 [Basilea ps... 266 3e-79	1	upstream	lipoprotein(AIL32199.1,IX83_01720)
Providencia burhodogranariea DSM 19968 [enterobacteria] taxid 1141662
gb	EKT62146.1	hypothetical protein OOA_07847 [Providencia... 276 7e-83	0
Achromobacter insuavis AXX-A [b-proteobacteria] taxid 1003200
gb	EGP44418.1	hypothetical protein AXXA_21063 [Achromobac... 256 2e-76	0
Osedax symbiont Rs1 [g-proteobacteria] taxid 1330036
ref	WP_019811179.1	putative peptide signal [Osedax symbio... 231 3e-67	0
Moraxella macacae 0408225 [g-proteobacteria] taxid 1230338
gb	ELA09013.1	hypothetical protein MOMA_01350 [Moraxella ... 235 5e-67	2	upstream	lipoprotein(MOMA_01340, LbpB)	tonBDR(MOMA_01345, LbpA)
Haemophilus sp. C1 [g-proteobacteria] taxid 1661745
ref	WP_053465354	hypothetical protein [Haemophilus sp. C1] 228 4e-70	1	upstream	lipoprotein(ABW51_RS02020)
Haemophilus sp. oral taxon 851 [g-proteobacteria] taxid 762964
ref	WP_009500157	hypothetical protein [Haemophilus sp. oral taxon 851] 226 2e-69	1	downstream	lipoprotein(HMPREF9096_RS05870)
Vibrio harveyi CAIM 1792 [g-proteobacteria] taxid 1125980
gb	EMR35879.1	hypothetical protein v partial [Vi... 209 1e-59	0
Novosphingobium pentaromativorans US6-1 [a-proteobacteria] taxid 1088721
gb	EHJ59344.1	hypothetical protein NSU_3676 [Novosphingob... 212 2e-59	1	upstream	lipoprotein( NSU_3675)
gb	EHJ62064.1	hypothetical protein NSU_0986 [Novosphingob... 199 2e-54	2	upstream	lipoprotein(NSU_0985)	lipoprotein(NSU_0984)	tonBDR(NSU_0983)
Neisseria wadsworthii 9715 [b-proteobacteria] taxid 1030841
gb	EGZ45155.1	hypothetical protein HMPREF9370_1714 [Neiss... 203 3e-57	1	upstream	hpuA-like protein (HMPREF9370_1712)
gb	EGZ44410.1	putative outer membrane protein [Neisseria ... 193 3e-52	0
Morganella morganii subsp. morganii KT [enterobacteria] taxid 1124991
ref	YP_007503921.1	hypothetical protein MU9_502 [Morganel... 195 1e-52	2	upstream/downstream	upstream - lipoprotein_5(YP_007503922.1,MU9_503)	downstream-MU9_503,YP_007503920.1, tonBDR)
Martelella sp. AD-3 [a-proteobacteria] taxid 686597
ref	WP_024710046.1	hypothetical protein [Martelella sp. A... 194 2e-52	1	upstream	lipoprotein(WP_024710045.1)
ref	WP_024706986.1	hypothetical protein [Martelella sp. A... 189 3e-50	1	upstream	lipoprotein(WP_024706985.1)
Martelella mediterranea [a-proteobacteria] taxid 293089
ref	WP_018067797.1	hypothetical protein [Martelella medit... 192 1e-51	1	upstream	lipoprotein(WP_018067796.1)
ref	WP_018064768.1	hypothetical protein [Martelella medit... 189 1e-50	1	upstream	lipoprotein(WP_018064769.1)
Sphingomonas elodea [a-proteobacteria] taxid 179878
ref	WP_010544305.1	hypothetical protein [Sphingomonas elo... 191 4e-51	0
Providencia alcalifaciens PAL-1 [enterobacteria] taxid 1256991
gb	EUD00777.1	PF04575 family protein [Providencia alcalif... 189 4e-50	0
Providencia rustigianii DSM 4541 [enterobacteria] taxid 500637
gb	EFB73751.1	hypothetical protein PROVRUST_05023 [Provid... 187 9e-50	0
Sphingobium indicum B90A [a-proteobacteria] taxid 861109
gb	EIM66542.1	hypothetical protein SIDU_15512 [Sphingobiu... 185 2e-49	0
Sphingobium japonicum UT26S [a-proteobacteria] taxid 452662
ref	YP_003545556.1	hypothetical protein SJA_C1-21100 [Sph... 185 2e-49	2	upstream	SJA_C1_2110 (lipprotein_5)	SJA_C1_21120 (CirA-like OM)
Proteus hauseri ZMd44 [enterobacteria] taxid 1312367
gb	EST57183.1	hypothetical protein K151_2986 [Proteus hau... 180 3e-47	0
Vibrio sp. HENC-02 [g-proteobacteria] taxid 992011
gb	EKM33996.1	hypothetical protein VCHENC02_0615 [Vibrio ... 171 3e-46	0
Sagittula stellata E-37 [a-proteobacteria] taxid 388399
gb	EBA06751.1	hypothetical protein SSE37_02650 [Sagittula... 177 3e-46	1	upstream	lipoprotein(SSE37_02655)
Sphingobium baderi LL03 [a-proteobacteria] taxid 1114964
gb	EQA96752.1	hypothetical protein L485_21970 [Sphingobiu... 176 3e-46	0
Sphingobium sp. SYK-6 [a-proteobacteria] taxid 627192
ref	WP_014075200.1	hypothetical protein [Sphingobium sp. ... 177 3e-46	1	upstream	lipoprotein_5(SLG_08750,YP_004834007.1)
Novosphingobium sp. Rr 2-17 [a-proteobacteria] taxid 555793
ref	WP_008995617.1	hypothetical protein [Novosphingobium ... 175 2e-45	1	upstream	tbpB_like(WSK_2691)
Sphingomonas sp. URHD0057 [a-proteobacteria] taxid 1380389
ref	WP_028969074.1	hypothetical protein [Sphingomonas sp.... 175 2e-45	0
Rhodobacteraceae bacterium PD-2 [a-proteobacteria] taxid 1169855
gb	ETA49419.1	hypothetical protein P279_24850 [Rhodobacte... 175 2e-45	1	upstream	lipoprotein(P279_24845)
Vibrio cholerae MZO-3 [g-proteobacteria] taxid 412883
gb	EAY42761.1	conserved hypothetical protein [Vibrio chol... 173 3e-45	1	downstream	lipoprotein(A51_B1847)
Sphingomonas echinoides [a-proteobacteria] taxid 59803
ref	WP_010406093.1	hypothetical protein [Sphingomonas ech... 174 3e-45	99
Phyllobacterium sp. YR531 [a-proteobacteria] taxid 1144343
ref	WP_008122044.1	Protein of unknown function (DUF560) [... 173 8e-45	1	upstream	lipoprotein(PMI41_00835)
Desulfovibrio inopinatus [d-proteobacteria] taxid 102109
ref	WP_027185532.1	hypothetical protein [Desulfovibrio in... 168 9e-43	0
Arsenophonus nasoniae [enterobacteria] taxid 638
ref	WP_026823066.1	hypothetical protein [Arsenophonus nas... 167 2e-42	0
Novosphingobium aromaticivorans DSM 12444 [a-proteobacteria] taxid 279238
ref	YP_496469.1	hypothetical protein Saro_1190 [Novosphin... 164 1e-41	1	downstream	Saro_1191 (Lipoprotein_5)
Proteus vulgaris [enterobacteria] taxid 585
gb	KGA56873.1	hypothetical protein DR95_3139 [Proteus vul... 163 4e-41	0
Novosphingobium sp. PP1Y [a-proteobacteria] taxid 702113
ref	WP_013836738.1	hypothetical protein [Novosphingobium ... 163 4e-41	1	upstream	lipoprotein(PP1Y_Mpl5894)		was re-annotated, also potential TonB receptor, present on plasmid MpI
Sulfitobacter sp. NAS-14.1 [a-proteobacteria] taxid 314267
ref	WP_009824365.1	hypothetical protein [Sulfitobacter sp... 161 1e-40	1	upstream	lipoprotein(NAS141_03561)
ref	WP_009824178.1	hypothetical protein [Sulfitobacter sp... 140 1e-33	1	upstream	lipoprotein(NAS141_00525)
Parvularcula bermudensis HTCC2503 [a-proteobacteria] taxid 314260
ref	YP_003854051.1	hypothetical protein PB2503_04172 [Par... 160 4e-40	1	downstream	PB2503_04167 (lipoprotein_5)
Sulfitobacter sp. EE-36 [a-proteobacteria] taxid 52598
ref	WP_005848995.1	hypothetical protein [Sulfitobacter sp... 159 1e-39	1	upstream	lipoprotein(EE36_02418)
ref	WP_005848630.1	hypothetical protein [Sulfitobacter sp... 143 2e-34	1	upstream	lipoprotein(EE36_01465)
Sulfitobacter pontiacus 3SOLIMAR09 [a-proteobacteria] taxid 1406866
gb	KAJ29565.1	hypothetical protein PM01_14035 [Sulfitobac... 158 1e-39	1	upstream	lipoprotein(PM01_14040)
gb	KAJ29185.1	hypothetical protein PM01_15210 [Sulfitobac... 143 2e-34	1	upstream	lipoprotein(PM01_15215)
Sulfitobacter sp. CB2047 [a-proteobacteria] taxid 1525218
gb	KFC27777.1	hypothetical protein IV89_03180 [Sulfitobac... 157 3e-39	1	upstream	lipoprotein(IV89_03175)
gb	KFC28145.1	hypothetical protein IV89_01270 [Sulfitobac... 144 7e-35	1	upstream	lipoprotein(IV89_01265)
Novosphingobium sp. AP12 [a-proteobacteria] taxid 1144305
ref	WP_007680777.1	hypothetical protein [Novosphingobium ... 155 2e-38	1	downstream	tbpB_iike(PMI02_01496)
Sideroxydans lithotrophicus ES-1 [b-proteobacteria] taxid 580332
ref	YP_003524827.1	hypothetical protein Slit_2212 [Sidero... 155 5e-38	1	downstream	lipoprotein(Slit_2211)
Polaromonas sp. CF318 [b-proteobacteria] taxid 1144318
ref	WP_007871145.1	putative enzyme of heme biosynthesis [... 153 1e-37	0
Proteus mirabilis HI4320 [enterobacteria] taxid 529507
ref	YP_002152809.1	hypothetical protein PMI3119 [Proteus ... 153 1e-37	2	upstream/downstream	upstream - pagP(PMI3118)	downstream - tonBDR(PMI3120)
Pelagibacterium halotolerans B2 [a-proteobacteria] taxid 1082931
ref	YP_004900715.1	hypothetical protein [Pelagibacterium ... 147 1e-35	1	upstream	lipoprotein(KKY_2972,YP_004900716)
Novosphingobium nitrogenifigens DSM 19370 [a-proteobacteria] taxid 983920
gb	EGD57379.1	hypothetical protein Y88_3688 [Novosphingob... 145 5e-35	1	downstream	tbpB0_like(Y88_3687)
Marinobacterium jannaschii [g-proteobacteria] taxid 64970
ref	WP_027858753.1	hypothetical protein [Marinobacterium ... 139 4e-33	1	downstream	potential_lipoprotein(Dsui_1243)
Azospira oryzae [b-proteobacteria] taxid 146939
ref	WP_014236345.1	hypothetical protein [Azospira oryzae] 139 6e-33	1	upstream	tbpB_like(EXJ11407.1,D791_01539)
Leeia oryzae [b-proteobacteria] taxid 356662
ref	WP_026182272.1	hypothetical protein [Leeia oryzae] 137 3e-32	0
Desulfurivibrio alkaliphilus AHT2 [d-proteobacteria] taxid 589865
ref	YP_003691166.1	hypothetical protein [Desulfurivibrio ... 136 7e-32	1	downstream	lipoprotein(DaAHT2_1866,YP_003691165.1)
Oceanicola sp. S124 [a-proteobacteria] taxid 1042378
ref	WP_010139780.1	hypothetical protein [Oceanicola sp. S... 136 7e-32	1	upstream	lipoprotein(WP_010139781.1)
Dinoroseobacter shibae DFL 12 = DSM 16493 [a-proteobacteria] taxid 398580
ref	YP_001532402.1	hypothetical protein Dshi_1059 [Dinoro... 135 1e-31	1	upstream	lipoprotein(Dshi_1060,YP_001532403.1)
Oceanicola batsensis HTCC2597 [a-proteobacteria] taxid 252305
gb	EAQ02413.1	hypothetical protein OB2597_20061 [Oceanico... 134 2e-31	1	upstream	lipoprotein( OB2597_20056)
Methyloglobulus morosus KoM1 [g-proteobacteria] taxid 1116472
gb	ESS70629.1	hypothetical protein MGMO_120c00160 [Methyl... 135 2e-31	1	upstream	potential lipoprotein(MGMO_120c00170)	a number of proteins involved in curli formation
Methyloversatilis sp. NVD [b-proteobacteria] taxid 1117409
ref	WP_018413219.1	hypothetical protein [Methyloversatili... 134 3e-31	0
Pandoraea pnomenusa 3kgm [b-proteobacteria] taxid 1416914
ref	YP_008835757.1	hypothetical protein U875_07320 [Pando... 134 4e-31	0
Nitratireductor indicus C115 [a-proteobacteria] taxid 1231190
gb	EKF40890.1	hypothetical protein NA8A_18402 [Nitratired... 133 9e-31	1	upstream	lipoprotein(NA8A_18407)
	No. of Slams	Total species
	353	225
		Classification	No. of Slams	Percentage	SLPs found	% with SLPs
		No lipoprotein not found	160	45.3258
		Lipoprotein + TonBDR	120	33.9943	185	52.4079
		Lipoprotein	65	18.4136
		Gene cluster unavailable	8	2.26629
		Total	353	100
Breakdown according to phylum
	39	a-proteobacteria
	42	b-proteobacteria
	114	g-proteobacteria
	2	d-proteobacteria
	28	enterobacteria
Total	225
